# Supplementary material for: The dose–response effect of physical activity on cancer mortality: findings from 71 prospective cohort studies
Source: HighWire-hosted journal article supplement (doi:10.1136/bjsports-2015-094927), 2015-09-18
Supplement: bjsports-2015-094927supp_table1.pdf [file bjsports-2015-094927supp_table1.pdf]

**Supplementary table S1** Characteristics of the study included in the meta-analysis on physical activity and cancer mortality

|   | Author (year) & Country <sup>ref</sup> | Study name                               | Gender | Age(y) at recruitment | No. death | No. case | No. cohort | Median follow-up(years or person-years) | Cancer type | Type of physical activity                                  | Main results                                                                                                                                                                                                                                                                                                                                         | Adjustment factors                                                                                                       |
|---|----------------------------------------|------------------------------------------|--------|-----------------------|-----------|----------|------------|-----------------------------------------|-------------|------------------------------------------------------------|------------------------------------------------------------------------------------------------------------------------------------------------------------------------------------------------------------------------------------------------------------------------------------------------------------------------------------------------------|--------------------------------------------------------------------------------------------------------------------------|
| 1 | Arraiz (1992) Canada <sup>1</sup>      | A population-based cohort study          | Both   | 30-69                 | 229       |          | 12218      | 7                                       | All         | Total physical activity                                    | Very active: 1.00<br>Active: 1.40 (0.80-2.30)<br>Moderate: 0.80 (0.40-1.40)<br>Inactive: 1.20 (0.70-1.90)<br>(Mean ± SD)s                                                                                                                                                                                                                            | Age, sex, smoking and alcohol consumption                                                                                |
| 2 | Kampert (1996) USA <sup>2</sup>        | A prospective observational study        | Both   | 20-88                 | 223       |          | 25341      | 8                                       | All         | Recreational physical activity                             | Male<br>Q1(622±151s): 1.00<br>Q2(817±125s): 0.55 (0.44, 0.7)<br>Q3(950±122s): 0.61 (0.48, 0.78)<br>Q4(1097±133s): 0.52 (0.41, 0.66)<br>Q5(1407±189s): 0.49 (0.37, 0.64)<br>Female<br>Q1(377±109s): 1.00<br>Q2(536±107s): 0.53 (0.30, 0.95)<br>Q3(628±116s): 0.56 (0.31, 1.01)<br>Q4(763±129s): 0.22 (0.10, 0.49)<br>Q5(1040±215s): 0.37 (0.19, 0.72) | Baseline differences in age, examination year, cigarette smoking, chronic illnesses, and electrocardiogram abnormalities |
| 3 | Rosengren (1997) Sweden <sup>3</sup>   | The Multifactor Primary Prevention Study | Male   | 47-55                 | 723       |          | 7142       | 20                                      | All         | Recreational physical activity                             | Sedentary, moderately active, regular exercise, athletic sports.<br>Two most active groups compared to the sedentary group: 0.78 (0.62, 0.99)<br>Inactive: 1.28 (1.1, 1.6)<br>Moderately active: 1.13 (0.9, 1.4)<br>Active: 1.00<br>Active group compared to inactive group with crude HR: 0.65 (0.53, 0.80)                                         | Age, serum cholesterol. Smoking, alcohol abuse, and manual versus nonmanual occupational class                           |
| 4 | Smith (2000) UK <sup>4</sup>           | The Whitehall Study                      | Male   | 40-64                 | 832       |          | 6702       | 25                                      | All         | Recreational physical activity                             | Inactive: 1.28 (1.1, 1.6)<br>Moderately active: 1.13 (0.9, 1.4)<br>Active: 1.00<br>Active group compared to inactive group with crude HR: 0.65 (0.53, 0.80)                                                                                                                                                                                          | Age, employment grade, BMI, smoking                                                                                      |
| 5 | Batty (2001) UK <sup>5</sup>           | The Whitehall Study                      | Male   | 40-64                 | 1151      |          | 18403      | 25                                      | All         | Travel activity<br>Walking or bicycling on the way to work | (Min/day)<br>0-9: 1.00<br>10-19: 1.05 (0.90, 1.20)<br>≥20: 0.99 (0.90, 1.10)                                                                                                                                                                                                                                                                         | Age, employment grade, BMI, smoking,                                                                                     |
| 6 | Kilander (2001) Sweden <sup>6</sup>    | A cohort study in Sweden                 | Male   | 48.6-51.1             | 216       |          | 2301       | 25.7                                    | All         | Recreational physical activity                             | Low: 1.09 (0.73, 1.64)<br>Medium: 0.96 (0.70, 1.33)<br>High: 1.00                                                                                                                                                                                                                                                                                    | Age, body height, diastolic blood pressure, systolic blood pressure, b-glucose, BMI, s-triglycerides, s-cholesterol      |

|    |                                                 |                                                        |      |                 |      |        |      |                   |                         |          |                                                                                                                                                              |                                                                                                                                                                                                                                                                                                          |
|----|-------------------------------------------------|--------------------------------------------------------|------|-----------------|------|--------|------|-------------------|-------------------------|----------|--------------------------------------------------------------------------------------------------------------------------------------------------------------|----------------------------------------------------------------------------------------------------------------------------------------------------------------------------------------------------------------------------------------------------------------------------------------------------------|
| 7  | Lee (2002) Korea <sup>7</sup>                   | The Korea Medical Insurance Corporation (KMIC)         | Male | 35-64           | 883  | 452645 | 5    | Lung cancer       | Recreational activity   | physical | No: 1.00<br>Yes: 0.80 (0.70, 0.90)                                                                                                                           | Age                                                                                                                                                                                                                                                                                                      |
| 8  | Lee (2003) USA <sup>8</sup>                     | The College Alumni Health Study                        | Both | 47.1 (mean age) | 212  | 32687  | 5    | Pancreatic cancer | Recreational activity   | physical | (KJ/wk)<br>< 2100: 1.00<br>2100-4199: 0.98 (0.65, 1.49)<br>4200-10499: 0.92 (0.62, 1.35)<br>≥10500: 1.31 (0.69, 1.92)                                        | Age (single years), sex, cigarette smoking, diabetes mellitus                                                                                                                                                                                                                                            |
| 9  | Hu (2005) Finland <sup>9</sup>                  | Prospective follow-up study                            | Both | 25-64           | 7394 | 47212  | 17.7 | All               | Total physical activity |          | Male<br>Low: 1.00<br>Moderate: 0.83 (0.69, 1.00)<br>High: 0.79 (0.65, 0.96)<br>Female<br>Low: 1.00<br>Moderate: 0.85 (0.71, 1.01)<br>High: 0.73 (0.60, 0.88) | Age, study year, education, smoking status, systolic blood pressure, cholesterol, BMI                                                                                                                                                                                                                    |
| 10 | Nilson (2006) Norway <sup>10</sup>              | The HUNT study                                         | Male | 41-100          | 276  | 29110  | 17.5 | Prostate cancer   | Recreational activity   | physical | No: 1.00<br>Low: 0.71 (0.50, 1.02)<br>Medium: 0.81 (0.60, 1.10)<br>High: 0.67 (0.78, 0.94)                                                                   | Age, BMI, marital status, education, alcohol consumption, smoking status                                                                                                                                                                                                                                 |
| 11 | Schnohr (2006) Denmark <sup>11</sup>            | The Copenhagen City Heart Study                        | Both | 20-93           | 632  | 4894   | 20   | All               | Recreational activity   | physical | (h/wk)<br><2: 1.00<br>2-4: 0.77 (0.61-0.97)<br>>4: 0.73 (0.56-0.95)                                                                                          | Age, sex, smoking, total-cholesterol, high-density lipoprotein-cholesterol, systolic blood pressure/antihypertensive drugs, diabetes, alcohol consumption, body mass index, education, income and forced respiratory volume in the first second of expiration (FEV1), measured at the second examination |
| 12 | Huxley (2007) Asia-Pacific region <sup>12</sup> | The Asia Pacific Cohort Studies Collaboration (APCSC)  | Both | 47              | 751  | 539201 | 6.8  | Colorectal cancer | Total physical activity |          | No: 1.00<br>Yes: 0.77 (0.60, 0.98)                                                                                                                           | Smoking, diabetes, and alcohol                                                                                                                                                                                                                                                                           |
| 13 | Lin (2007) Japan <sup>13</sup>                  | The Japanese Collaborative Cohort study for Evaluation | Both | 40-79           | 402  | 110792 | 13   | Pancreatic cancer | Recreational activity   | physical | Walking (min/day)<br>Male<br><30: 1.00<br>30: 0.84 (0.46, 1.50)                                                                                              | Age, BMI, cigarette smoking                                                                                                                                                                                                                                                                              |

|    |                                     | of Cancer Risk (JACC)            |        |       |      |       |     |     |                                |            |                                                                                                                                                                                                           |                                                                                                                                                                                                                                           |
|----|-------------------------------------|----------------------------------|--------|-------|------|-------|-----|-----|--------------------------------|------------|-----------------------------------------------------------------------------------------------------------------------------------------------------------------------------------------------------------|-------------------------------------------------------------------------------------------------------------------------------------------------------------------------------------------------------------------------------------------|
|    |                                     |                                  |        |       |      |       |     |     |                                |            | 31-59: 0.68 (0.37, 1.24)<br>≥60: 0.85 (0.51, 1.41)                                                                                                                                                        |                                                                                                                                                                                                                                           |
|    |                                     |                                  |        |       |      |       |     |     |                                |            | Female                                                                                                                                                                                                    |                                                                                                                                                                                                                                           |
|    |                                     |                                  |        |       |      |       |     |     |                                |            | <30: 1.00                                                                                                                                                                                                 |                                                                                                                                                                                                                                           |
|    |                                     |                                  |        |       |      |       |     |     |                                |            | 30: 1.17 (0.62, 2.22)                                                                                                                                                                                     |                                                                                                                                                                                                                                           |
|    |                                     |                                  |        |       |      |       |     |     |                                |            | 31-59: 0.77 (0.40, 1.50)                                                                                                                                                                                  |                                                                                                                                                                                                                                           |
|    |                                     |                                  |        |       |      |       |     |     |                                |            | ≥60: 1.04 (0.59, 1.84)                                                                                                                                                                                    |                                                                                                                                                                                                                                           |
|    |                                     |                                  |        |       |      |       |     |     |                                |            | Sports (h/wk)                                                                                                                                                                                             |                                                                                                                                                                                                                                           |
|    |                                     |                                  |        |       |      |       |     |     |                                |            | Male                                                                                                                                                                                                      |                                                                                                                                                                                                                                           |
|    |                                     |                                  |        |       |      |       |     |     |                                |            | <1: 1.00                                                                                                                                                                                                  |                                                                                                                                                                                                                                           |
|    |                                     |                                  |        |       |      |       |     |     |                                |            | 1-2: 0.74 (0.46, 1.19)                                                                                                                                                                                    |                                                                                                                                                                                                                                           |
|    |                                     |                                  |        |       |      |       |     |     |                                |            | 3-4: 0.82 (0.45, 1.49)                                                                                                                                                                                    |                                                                                                                                                                                                                                           |
|    |                                     |                                  |        |       |      |       |     |     |                                |            | ≥5: 1.04 (0.63, 1.72)                                                                                                                                                                                     |                                                                                                                                                                                                                                           |
|    |                                     |                                  |        |       |      |       |     |     |                                |            | Female                                                                                                                                                                                                    |                                                                                                                                                                                                                                           |
|    |                                     |                                  |        |       |      |       |     |     |                                |            | <1: 1.00                                                                                                                                                                                                  |                                                                                                                                                                                                                                           |
|    |                                     |                                  |        |       |      |       |     |     |                                |            | 1-2: 0.72 (0.42, 1.22)                                                                                                                                                                                    |                                                                                                                                                                                                                                           |
|    |                                     |                                  |        |       |      |       |     |     |                                |            | 3-4: 0.76 (0.37, 1.55)                                                                                                                                                                                    |                                                                                                                                                                                                                                           |
|    |                                     |                                  |        |       |      |       |     |     |                                |            | ≥5: 0.88 (0.44, 1.74)                                                                                                                                                                                     |                                                                                                                                                                                                                                           |
| 14 | Matthews (2007) China <sup>14</sup> | Shanghai Women's Health Study    | Female | 40-70 | 537  | 67143 | 5.7 | All | Recreational physical activity | (MET-h/wk) | ≤9.9: 1.00<br>10.0-13.6: 1.03 (0.81, 1.32)<br>13.7-18.0: 0.84 (0.65, 1.08)<br>≥18.1: 0.77 (0.61, 1.00)                                                                                                    | Age, marital status, education, household income, smoking, alcohol drinking, number of pregnancies, oral contraceptive use, menopausal status, other types of physical activity, hypertension, respiratory disease, and chronic hepatitis |
| 15 | Orsini (2008) Sweden <sup>15</sup>  | The Cohort of Swedish Men (COSM) | Male   | 45-79 | 901  | 37663 | 9.7 | All | Total physical activity        | (MET-h/wk) | BMI<25<br>Low (<39): 1.00<br>Medium(39-44):2.11(1.04, 4.27)<br>High (>44): 2.48 (1.20, 5.12)<br>BMI>25<br>Low (<39): 1.83 (0.84, 3.99)<br>Medium(39-44):1.90(0.92, 3.94)<br>High (>44): 2.02 (0.98, 4.17) | Age, alcohol consumption, educational level, and parental history with respect to coronary heart disease and cancer                                                                                                                       |
| 16 | Van Dam (2008) USA <sup>16</sup>    | The nurses' health study         | Female | 34-59 | 4527 | 77782 | 24  | All | Total physical activity        | (h/wk)     | 0-0.4: 1.00<br>0.5-1.9: 0.88 (0.79-0.97)<br>2.0-3.4: 0.83 (0.75-0.93)<br>3.5-5.4: 0.82 (0.72-0.94)<br>≥5.5: 0.73 (0.64-0.84)                                                                              | Age, time period, cigarette smoking, alcohol consumption(g/day), healthy diet score, BMI                                                                                                                                                  |

|    |                                         |                                              |        |          |      |        |      |                   |                                |                                |            |                                                                                                                                                                                                                                                                            |
|----|-----------------------------------------|----------------------------------------------|--------|----------|------|--------|------|-------------------|--------------------------------|--------------------------------|------------|----------------------------------------------------------------------------------------------------------------------------------------------------------------------------------------------------------------------------------------------------------------------------|
| 17 | Orsini (2009) Sweden <sup>17</sup>      | A population-based cohort of Swedish men     | Male   | 45-79    | 199  | 45887  | 9    | Prostate cancer   | Total physical activity        | (MET-h/wk)                     |            | Age, waist – hip ratio, height, diabetes, alcohol consumption, smoking status, years of education, total energy intake, consumption of dairy product and red meat and parental history with respect to prostate cancer.                                                    |
|    |                                         |                                              |        |          |      |        |      |                   |                                |                                |            | 37(<39): 1.00<br>41(39-42.2): 0.96 (0.53-1.75)<br>44(42.5-46): 1.02 (0.55-1.87)<br>48(>46): 0.98 (0.53-1.83)                                                                                                                                                               |
| 18 | Stevens (2009) UK <sup>18</sup>         | Million Women Study                          | Female | 55.9±4.5 | 1710 | 130000 | 8.9  | Pancreatic cancer | Recreational physical activity | (Time/wk)                      |            | Age, region, socioeconomic status, smoking, BMI and height                                                                                                                                                                                                                 |
|    |                                         |                                              |        |          |      | 0      |      |                   |                                |                                |            | <1: 1.0<br>1: 0.87<br>2-3: 1.03<br>≥4: 1.01                                                                                                                                                                                                                                |
| 19 | Autenrieth (2011) Germany <sup>19</sup> | The second MONICA/KORA Augsburg survey       | Both   | 25-74    | 326  | 4672   | 17.8 | All               | Recreational physical activity | (MET-h/wk)                     |            | Sex, BMI, systolic blood pressure, total-to-HDL cholesterol ratio, education, smoking status, alcohol consumption, myocardial infarction, stroke, diabetes, cancer, self-reported limited physical activity due to health problems, and other domains of physical activity |
|    |                                         |                                              |        |          |      |        |      |                   |                                |                                |            | 0: 1.00<br><3: 0.58 (0.42-0.80)<br>3-6: 0.56 (0.40-0.77)<br>>6: 0.36 (0.23-0.59)                                                                                                                                                                                           |
| 20 | Batty (2011) UK <sup>20</sup>           | The Whitehall study                          | Male   | 40-69    | 578  | 17934  | 40   | Prostate cancer   | Recreational physical activity | Recreational physical activity |            | Age at risk, BMI, plasma cholesterol, socio-economic status, diabetes/blood glucose, marital status, FEV1, height, smoking, and diastolic and systolic blood pressure                                                                                                      |
|    |                                         |                                              |        |          |      |        |      |                   |                                |                                |            | Low: 1.00<br>Middle: 1.24 (0.88-1.73)<br>High: 1.12(0.76-1.64)<br>Travel activity (Min/day)<br>0-9: 1.00<br>10-19: 1.24 (0.88-1.73)<br>20-29: 1.26 (0.92-1.72)<br>30-39: 1.3 (0.86-1.97)<br>≥40: 1.65 (0.87-3.15)                                                          |
| 21 | Borch (2011) Norway <sup>21</sup>       | The Norwegian Women and Cancer (NOWAC) Study | Female | 30-70    | 1584 | 66136  | 12   | All               | Recreational physical activity | physical activity              | Ten levels | BMI, height, smoking status, years of smoking, amount of smoking, alcohol intake, menopausal status, age at first birth, parity, hormone therapy use, cardiovascular disease diabetes mellitus and                                                                         |
|    |                                         |                                              |        |          |      |        |      |                   |                                |                                |            | 1: 1.32 (0.96-1.81)<br>2: 1.48 (1.19-1.84)<br>3: 1.26 (1.06-1.5)<br>4: 1.07 (0.91-1.25)<br>5: 1.00<br>6: 0.88 (0.75-1.03)<br>7: 0.90 (0.76-1.07)<br>8: 0.92 (0.74-1.13)                                                                                                    |

|    |                                        |                                                                               |      |                                        |      |        |                       |                   |                       |          |                                                                                                                                                                                                                                                                                                                                |                                                                                                                                                                       |
|----|----------------------------------------|-------------------------------------------------------------------------------|------|----------------------------------------|------|--------|-----------------------|-------------------|-----------------------|----------|--------------------------------------------------------------------------------------------------------------------------------------------------------------------------------------------------------------------------------------------------------------------------------------------------------------------------------|-----------------------------------------------------------------------------------------------------------------------------------------------------------------------|
| 22 | Laukkanen (2011) Finland <sup>22</sup> | An eastern Finnish follow-up study                                            | Male | 42.0-61.3                              | 181  | 2560   | 16.7                  | All               | Recreational activity | physical | 9: 0.84 (0.60-1.170)<br>10: 0.75 (0.49-1.15)<br>(MET-h/wk)<br><3.7: 1.00<br>3.7-4.4: 0.99 (0.68-1.46)<br>4.5-5.2: 0.95 (0.64-1.41)<br>>5.2: 0.64 (0.40-1.00)                                                                                                                                                                   | prevalent cancer<br>Age, examination year, cigarette smoking, alcohol consumption, BMI, caloric, fiber and fat intake.                                                |
| 23 | McCullough (2011) USA <sup>23</sup>    | The Cancer Prevention Study-II Nutrition Cohort (The CPS-II Nutrition Cohort) | Both | 50-74                                  | 5874 | 111966 | 14                    | All               | Recreational activity | physical | (MET-h/wk)<br>Male<br><8.75: 1.00<br>8.75-17.5: 1.00 (0.91-1.09)<br>>17.5: 1.00 (0.92-1.08)<br>Female<br><8.75: 1.00<br>8.75-17.5: 0.97 (0.88-1.08)<br>>17.5: 0.99 (0.89-1.09)                                                                                                                                                 | Age, smoking status, education, BMI, alcohol intake, health diet score                                                                                                |
| 24 | Morrison (2011) England <sup>24</sup>  | The Whitehall I study                                                         | Male | 40-69                                  | 329  | 17949  | 40                    | Colorectal cancer | Recreational activity | physical | (Min/day)<br>Colon cancer<br>0-9: 1.00<br>10-19: 1.09 (0.92-1.28)<br>≥20: 0.88 (0.61-1.26)<br>Rectal cancer<br>0-9: 1.00<br>10-19: 0.91 (0.71-1.16)<br>≥20: 0.74 (0.43-1.26)                                                                                                                                                   | Age, height, BMI, plasma cholesterol, diabetes, socioeconomic, smoking                                                                                                |
| 25 | Nakamura (2011) Japan <sup>25</sup>    | A population-based prospective study                                          | Both | 54.7±12.4 (Male)<br>55.8±13.2 (Female) | 51   | 30826  | 212247 (person-years) | Pancreatic cancer | Recreational activity | physical | Male<br>Low: 1.00<br>Middle: 1.13 (0.48-2.67)<br>High: 1.03 (0.41-2.60)<br>Female<br>Low: 1.00<br>Middle: 1.56 (0.44-5.56)<br>High: 3.29 (0.96-11.2)                                                                                                                                                                           | Age, smoking status, BMI, history of diabetes mellitus                                                                                                                |
| 26 | Wen (2011) China <sup>26</sup>         | A historically prospective cohort study                                       | Both | ≥20                                    | 4722 | 11802  | 8.05                  | All               | Recreational activity | physical | (MET-h/wk)<br>Overall<br><3.75: 1.00<br>3.75-7.49: 0.90 (0.83-0.99)<br>7.50-16.49: 0.85 (0.77-0.93)<br>16.50-25.49: 0.85 (0.75-0.97)<br>≥25.5: 0.78 (0.69-0.88)<br>Colorectal cancer<br><3.75: 1.00<br>3.75-7.49: 1.08 (0.83-1.41)<br>7.50-16.49: 0.71 (0.52-0.96)<br>16.50-25.49: 0.84 (0.56-1.25)<br>≥25.5: 0.77 (0.53-1.12) | Age, sex, education, activity at work, smoking, drinking, fasting blood glucose, systolic blood pressure, body mass index, diabetes history, and hypertension history |

|    |                                        |                                                                         |      |       |      |        |      |                   |                         |          |                                                                                                                                                                                                                                                                                                                                                                                                                                                                                                                                                                |                                                                                                                                                                                                  |                                                                                                                                          |
|----|----------------------------------------|-------------------------------------------------------------------------|------|-------|------|--------|------|-------------------|-------------------------|----------|----------------------------------------------------------------------------------------------------------------------------------------------------------------------------------------------------------------------------------------------------------------------------------------------------------------------------------------------------------------------------------------------------------------------------------------------------------------------------------------------------------------------------------------------------------------|--------------------------------------------------------------------------------------------------------------------------------------------------------------------------------------------------|------------------------------------------------------------------------------------------------------------------------------------------|
|    |                                        |                                                                         |      |       |      |        |      |                   |                         |          | <p>Liver cancer</p> <p>&lt;3.75: 1.00</p> <p>3.75-7.49: 0.97 (0.80-1.41)</p> <p>7.50-16.49: 0.92 (0.75-1.12)</p> <p>16.50-25.49: 0.80 (0.60-1.07)</p> <p>≥25.5: 0.65 (0.49-0.86)</p> <p>Breast cancer</p> <p>&lt;3.75: 1.00</p> <p>3.75-7.49: 0.99 (0.64-1.52)</p> <p>7.50-16.49: 1.40 (0.89-2.21)</p> <p>16.50-25.49: 1.73 (0.96-3.11)</p> <p>≥25.5: 0.86 (0.37-2.01)</p> <p>Lung cancer</p> <p>&lt;3.75: 1.00</p> <p>3.75-7.49: 0.73 (0.59-0.90)</p> <p>7.50-16.49: 0.93 (0.77-1.14)</p> <p>16.50-25.49: 0.78 (0.59-1.04)</p> <p>≥25.5: 0.79 (0.61-1.02)</p> |                                                                                                                                                                                                  |                                                                                                                                          |
| 27 | Mok (2012) Korea <sup>27</sup>         | A cohort study in Korea                                                 | Both | 30-93 | 1060 | 59636  | 10.3 | Colorectal cancer | Recreational activity   | physical | (MET-min/wk)                                                                                                                                                                                                                                                                                                                                                                                                                                                                                                                                                   | <p>Male</p> <p>0: 1.00</p> <p>3.5-10000: 0.66 (0.53-0.81)</p> <p>&gt;1000: 0.79 (0.64-0.96)</p> <p>Female</p> <p>0: 1.00</p> <p>3.5-1000: 0.62 (0.41-0.92)</p> <p>&gt;1000: 0.66 (0.42-1.06)</p> | Age, smoking status, alcohol intake, body mass index, hypertension, total cholesterol, and diabetes                                      |
| 28 | Parekh (2012) USA <sup>28</sup>        | The NHANES III (Third National Health and Nutrition Examination Survey) | Both | 20-89 | 860  | 15535  | 18   | All               | Recreational activity   | physical | (MET-min/wk)                                                                                                                                                                                                                                                                                                                                                                                                                                                                                                                                                   | <p>&lt;1.16: 1.00</p> <p>1.16-10.47: 0.85 (0.67-1.08)</p> <p>10.48-32: 0.74 (0.56-0.98)</p> <p>&gt;48.33: 0.89 (0.68-1.16)</p>                                                                   | Age, race, sex, and smoking                                                                                                              |
| 29 | Sahlqvist (2013) England <sup>29</sup> | EPIC-Norfolk cohort                                                     | Both | 40-79 | 700  | 13346  | 11.5 | All               | Recreational activity   | physical | (Min/wk)                                                                                                                                                                                                                                                                                                                                                                                                                                                                                                                                                       | <p>0: 1.00</p> <p>1-59: 0.95 (0.71-1.25)</p> <p>≥60: 1.12 (0.80-1.58)</p>                                                                                                                        | Age, sex, education level, social class, smoking status, family history of cancer or cardiovascular disease, all other physical activity |
| 30 | Vergnaud (2013) Europe <sup>30</sup>   | The European Prospective Investigation into Cancer and Nutrition        | Both | 25-70 | 9388 | 378864 | 12.8 | All               | Total physical activity |          |                                                                                                                                                                                                                                                                                                                                                                                                                                                                                                                                                                | <p>HR of cancer death per 1-unit increase of each World Cancer Research Fund (WCRF)/ (&gt;0.5 points) AICR score component: 0.90 (0.86-0.94)</p>                                                 | sex, age at recruitment, and center and adjusted for educational level, smoking status and intensity of smoking, and                     |

| study (EPIC) |                                   |                                                                |        |       |       |        |      |               |                                |                                                                                                                                                                                                                                                                                                                                                                                                              | menopause status and all WCRF/AICR components were mutually adjusted. Age, educational level, income, occupation, alcohol consumption, pack-years of smoking, daily intake of energy, red meat, fruits, and vegetables, daily physical activity other than exercise, body mass index, and history of cardiovascular disease, diabetes, hypertension, chronic liver disease, or pulmonary disease |
|--------------|-----------------------------------|----------------------------------------------------------------|--------|-------|-------|--------|------|---------------|--------------------------------|--------------------------------------------------------------------------------------------------------------------------------------------------------------------------------------------------------------------------------------------------------------------------------------------------------------------------------------------------------------------------------------------------------------|--------------------------------------------------------------------------------------------------------------------------------------------------------------------------------------------------------------------------------------------------------------------------------------------------------------------------------------------------------------------------------------------------|
| 31           | Wang (2013) China <sup>31</sup>   | The Shanghai Men's Health Study (SMHS)                         | Male   | 40-74 | 1053  | 61477  | 5.48 | All           | Total physical activity        | (MET-h/wk)<br>No regular exercise: 1.00<br><13.9: 0.81 (0.68-0.96)<br>≥13.9: 0.81 (0.86-0.94)                                                                                                                                                                                                                                                                                                                | Follow-up age, race, menopause, oral contraceptive and estrogen/progesterone use, BMI                                                                                                                                                                                                                                                                                                            |
| 32           | Williams (2013) USA <sup>32</sup> | The National Walkers' and Runners' Health Studies              | Female | /     | 101   | 79124  | 11.0 | Breast cancer | Running and Walking            | (MET-h/wk)<br><13.9: 1.00<br>7.5-12.5: 0.47 (0.21-0.97)<br>≥12.5: 0.61 (0.38-1.01)                                                                                                                                                                                                                                                                                                                           | Age, education level, Hong Kong ladder, total energy intake, DQI, smoking, and alcohol use, BMI, frailty index, living arrangement, and level of leisure time physical activity/housework                                                                                                                                                                                                        |
| 33           | Yu (2013) China <sup>33</sup>     | A cohort study on osteoporosis and general health in Hong Kong | Both   | ≥65   | 452   | 2867   | 9.2  | All           | Recreational physical activity | Male<br>Light<br>Inactive: 1.00<br>Active: 1.01 (0.70-1.46)<br>Moderate<br>Inactive: 1.00<br>Active: 1.18 (0.79-1.77)<br>Strenous/muscle-conditioning<br>Inactive: 1.00<br>Active: 0.89 (0.57-1.39)<br>Female<br>Light<br>Inactive: 1.00<br>Active: 0.70 (0.41-1.21)<br>Moderate<br>Inactive: 1.00<br>Active: 0.38 (0.14-1.07)<br>Strenous/muscle-conditioning<br>Inactive: 1.00<br>Active: 0.93 (0.29-2.95) |                                                                                                                                                                                                                                                                                                                                                                                                  |
| 34           | Arem (2014) USA <sup>34</sup>     | The NIH-AARP                                                   | Both   | 50-71 | 15001 | 293511 | 12.1 | All           | Recreational physical activity | (h/wk)<br>All cancers                                                                                                                                                                                                                                                                                                                                                                                        | Sex, BMI, education, race, alcohol, healthy                                                                                                                                                                                                                                                                                                                                                      |

---

Diet and  
Health Study

Never: 1.00  
<1: 0.95 (0.89-1.01)  
1-3: 0.93 (0.88-0.98)  
4-7: 0.90 (0.85-0.95)  
>7: 0.89 (0.84-0.94)

Lymphocytic leukemia  
Never: 1.00  
<1: 0.96 (0.48-1.89)  
1-3: 1.3 (0.76-2.21)  
4-7: 0.65 (0.35-1.19)  
>7: 0.68 (0.37-1.25)

Colon  
Never: 1.00  
<1: 0.80 (0.63-1.01)  
1-3: 0.85 (0.70-1.02)  
4-7: 0.79 (0.65-0.96)  
>7: 0.70 (0.57-0.85)

Liver  
Never: 1.00  
<1: 0.79 (0.54-1.14)  
1-3: 0.90 (0.68-1.21)  
4-7: 0.64 (0.47-0.88)  
>7: 0.71 (0.52-0.98)

Oral cavity and pharynx  
Never: 1.00  
<1: 0.83 (0.48-1.44)  
1-3: 0.79 (0.51-1.24)  
4-7: 0.76 (0.48-1.21)  
>7: 0.75 (0.47-1.20)

Non-Hodgkins lymphoma  
Never: 1.00  
<1: 1.19 (0.90-1.58)  
1-3: 0.76 (0.58-0.98)  
4-7: 0.83 (0.64-1.06)  
>7: 0.80 (0.62-1.04)

Esophagus  
Never: 1.00  
<1: 0.92 (0.65-1.29)  
1-3: 0.91 (0.69-1.20)  
4-7: 0.96 (0.73-1.27)  
>7: 0.80 (0.60-1.08)

Myeloma  
Never: 1.00  
<1: 0.75 (0.49-1.14)  
1-3: 0.56 (0.40-0.81)  
4-7: 0.77 (0.55-1.07)

---

eating index 2010 score,  
calories, marriage status,  
diabetes and smoke level



---

>7: 0.84 (0.77-0.92)

**Lung**

Never: 1.00

<1: 0.85 (0.76-0.95)

1-3: 0.92 (0.84-1.00)

4-7: 0.82 (0.75-0.90)

>7: 0.84 (0.77-0.92)

**Myeloid/monocytic**

Never: 1.00

<1: 1.27 (0.86-1.86)

1-3: 0.85 (0.60-1.21)

4-7: 1.10 (0.79-1.54)

>7: 0.86 (0.60-1.22)

**Stomach**

Never: 1.00

<1: 1.00 (0.65-1.56)

1-3: 0.99 (0.69-1.42)

4-7: 0.97 (0.67-1.40)

>7: 0.90 (0.61-1.31)

**Ovarian**

Never: 1.00

<1: 0.92 (0.62-1.36)

1-3: 0.83 (0.59-1.150)

4-7: 0.87 (0.63-1.21)

>7: 0.91 (0.65-1.31)

**Prostate**

Never: 1.00

<1: 0.97 (0.69-1.37)

1-3: 0.79 (0.59-1.06)

4-7: 1.03 (0.78-1.37)

>7: 0.93 (0.69-1.240)

**Bladder**

Never: 1.00

<1: 1.25 (0.84-1.86)

1-3: 0.97 (0.68-1.38)

4-7: 0.95 (0.67-1.36)

>7: 1.03 (0.72-1.46)

**Breast**

Never: 1.00

<1: 1.21 (0.82-1.80)

1-3: 0.92 (0.65-1.29)

4-7: 0.97 (0.68-1.37)

>7: 1.08 (0.76-1.53)

**Brain**

Never: 1.00

<1: 1.14 (0.78-1.66)

---

|    |                                     |                                                |      |       |      |       |     |     |                                      |                                                                                                                                                                                                                                                                                                                                                         |                                                                                                                                                                                                                                                                                                                                                                                                                                                                                                                                                                                                                                                                                         |  |
|----|-------------------------------------|------------------------------------------------|------|-------|------|-------|-----|-----|--------------------------------------|---------------------------------------------------------------------------------------------------------------------------------------------------------------------------------------------------------------------------------------------------------------------------------------------------------------------------------------------------------|-----------------------------------------------------------------------------------------------------------------------------------------------------------------------------------------------------------------------------------------------------------------------------------------------------------------------------------------------------------------------------------------------------------------------------------------------------------------------------------------------------------------------------------------------------------------------------------------------------------------------------------------------------------------------------------------|--|
|    |                                     |                                                |      |       |      |       |     |     |                                      |                                                                                                                                                                                                                                                                                                                                                         | <p>1-3: 1.03 (0.75-1.42)<br/> 4-7: 0.91 (0.65-1.26)<br/> &gt;7: 1.14 (0.82-1.56)</p> <p>Endometrial<br/> Never: 1.00<br/> &lt;1: 1.52 (0.85-2.69)<br/> 1-3: 0.79 (0.45-1.38)<br/> 4-7: 1.13 (0.66-1.93)<br/> &gt;7: 1.21 (0.70-2.08)</p> <p>Pancreas<br/> Never: 1.00<br/> &lt;1: 1.35 (1.07-1.70)<br/> 1-3: 1.14 (0.80-1.64)<br/> 4-7: 1.28 (1.05-1.56)<br/> &gt;7: 1.25 (1.03-1.53)</p> <p>Kidney<br/> Never: 1.00<br/> &lt;1: 1.10 (0.71-1.70)<br/> 1-3: 1.14 (0.80-1.64)<br/> 4-7: 1.47 (1.03-2.09)<br/> &gt;7: 1.42 (0.98-2.03)</p> <p>Rectum<br/> Never: 1.00<br/> &lt;1: 1.26 (0.64-2.48)<br/> 1-3: 1.57 (0.90-2.71)<br/> 4-7: 1.27 (0.72-2.25)<br/> &gt;7: 1.63 (0.93-2.84)</p> |  |
| 35 | Hastert (2014)<br>USA <sup>35</sup> | Vitamins and<br>Lifestyle<br>(VITAL)<br>cohort | Both | 50-76 | 1595 | 57841 | 7.7 | All | Recreational<br>physical<br>activity | <p>&lt;30 min/day or &lt;5 day/wk or &lt;7 of<br/> the previous 10 years of moderate or<br/> fast walking and/or moderate or<br/> strenuous activity: 1.00<br/> &gt;30 minutes/day of moderate or fast<br/> walking and/or moderate or<br/> strenuous activity on at least 5 days/wk<br/> in at least 7 of the past 10 years: 0.91<br/> (0.79-1.04)</p> | Age, sex, education,<br>race/ethnicity, marital<br>status, PSA screening in<br>previous 2 years,<br>colonoscopy or<br>sigmoidoscopy in<br>previous 10 years, cancers<br>diagnosed in first-degree<br>relatives, non-steroidal<br>anti-inflammatory<br>medication and regular or<br>low-dose aspirin use,<br>pack-years of smoking,<br>and kilocalories of<br>average daily energy<br>intake. Several additional<br>reproductive factors were<br>included for women,<br>including age at                                                                                                                                                                                                 |  |

|    |                                         |                                                                                             |        |       |      |       |      |               |                         |          |                                                                                                                                                                                                                                                   |                                                                                                                                                                                                                                          |
|----|-----------------------------------------|---------------------------------------------------------------------------------------------|--------|-------|------|-------|------|---------------|-------------------------|----------|---------------------------------------------------------------------------------------------------------------------------------------------------------------------------------------------------------------------------------------------------|------------------------------------------------------------------------------------------------------------------------------------------------------------------------------------------------------------------------------------------|
| 36 | Wanner (2014) Switzerland <sup>36</sup> | The National Research Program 1A and Swiss MONICA study                                     | Both   | 16-92 | 1351 | 17663 | 20.2 | All           | Recreational activity   | physical | Female and Male<br>Low: 1.00<br>Moderate: 0.92 (0.82-1.04)<br>High: 0.69 (0.54-0.90)<br>Male<br>Low: 1.00<br>Moderate: 0.91 (0.77-1.06)<br>High: 0.63 (0.47-0.86)<br>Female<br>Low: 1.00<br>Moderate: 0.91 (0.76-1.09)<br>High: 1.04 (0.66-1.660) | menarche, age at birth of first child, years of estrogen-only, and of combined estrogen plus progestin hormone therapy use, hysterectomy, and age at menopause<br>Age, educational level, marital status, survey, smoking and nutrition  |
| 37 | Rohan (1995) Austria <sup>37</sup>      | A population-based cohort of breast cancer patients                                         | Female | 20-74 | 112  | 411   | 5.5  | Breast cancer | Recreational activity   | physical | (Kcal/wk)<br>0: 1.00<br>0-2000: 1.42 (0.78-2.60)<br>2000-4000: 0.73 (0.37-1.42)<br>>4000: 0.98 (0.50-1.94)r                                                                                                                                       | Age, ER and PR status, tumour diameter, years of education, history of benign breast disease, age at menarche, age at first live birth, height, Quetelet's index, energy intake and menopausal status<br>Age, stage at diagnosis and BMI |
| 38 | Enger (2004) USA <sup>38</sup>          | A population-based case-control study                                                       | Female | 21-40 | 251  | 717   | 10.4 | Breast cancer | Recreational activity   | physical | (h/wk)<br>0: 1.00<br>0.1-3.7: 0.86 (0.61-1.21)<br>>3.8: 1.34 (0.72-2.47)                                                                                                                                                                          | Age, stage at diagnosis and BMI                                                                                                                                                                                                          |
| 39 | Borugian (2004) Canada <sup>39</sup>    | A cohort study from the Vancouver Cancer Centre (VCC) of the British Columbia Cancer Agency | Female | 19-75 | 112  | 603   | 10   | Breast cancer | Total physical activity |          | Pre-diagnosis<br>Climbing (Flight)<br>None: 1.00<br>1-4: 1.20 (0.70-2.20)<br>5-8: 1.40 (0.80-2.60)<br>>9: 1.10 (0.50-2.20)<br>Walking (Block)<br>None: 1.00<br>1-4: 1.10 (0.60-1.90)<br>5-8: 1.00 (0.50-1.90)<br>>9: 1.00 (0.50-1.90)<br>Sports   | Total caloric intake, age, stage at diagnosis                                                                                                                                                                                            |

|    |                                    |                                       |        |       |     |      |     |               |                       |          |                                                                                                                                                                                                                                                                                                                                                                                                                                                                                                                                                                                                                                                                                                                                                                                                                                                                                                                                                                                                                                                                                                                                                                                                                                                                                                                                                                                                       |  |
|----|------------------------------------|---------------------------------------|--------|-------|-----|------|-----|---------------|-----------------------|----------|-------------------------------------------------------------------------------------------------------------------------------------------------------------------------------------------------------------------------------------------------------------------------------------------------------------------------------------------------------------------------------------------------------------------------------------------------------------------------------------------------------------------------------------------------------------------------------------------------------------------------------------------------------------------------------------------------------------------------------------------------------------------------------------------------------------------------------------------------------------------------------------------------------------------------------------------------------------------------------------------------------------------------------------------------------------------------------------------------------------------------------------------------------------------------------------------------------------------------------------------------------------------------------------------------------------------------------------------------------------------------------------------------------|--|
|    |                                    |                                       |        |       |     |      |     |               |                       |          | <p>None: 1.00<br/> A few time/year: 1.10(0.60-2.00)<br/> A few time/month:1.20(0.40-2.60)<br/> 1 time/wk: 0.70 (0.30-1.70)<br/> &gt;1 time/wk: 1.00 (0.50-1.90)</p> <p>Exercise</p> <p>None: 1.00<br/> A few time/year: 1.10 (0.60-2.00)<br/> A few time/month: 1.20 (0.40-2.60)<br/> 1 time/wk: 0.70 (0.30-1.70)<br/> &gt;1 time/wk: 1.00 (0.50-3.20)</p> <p>Jogging</p> <p>None: 1.00<br/> A few time/year: 1.50 (0.50-4.10)<br/> A few time/month: 1.90 (0.70-5.40)<br/> 1 time/wk: 1.80 (0.40-7.50)<br/> &gt;1 time/wk: 1.80 (0.40-7.50)</p> <p>Swimming</p> <p>None: 1.00<br/> A few time/year: 1.20 (0.60-2.400)<br/> A few time/month: 1.00 (0.50-2.00)<br/> 1 time/wk: 1.20 (0.70-2.30)<br/> &gt;1 time/wk: 0.90 (0.50-1.50)</p> <p>Gardening</p> <p>None: 1.00<br/> A few time/year: 1.00 (0.60-1.80)<br/> A few time/month: 1.60 (0.90-2.70)<br/> 1 time/wk: 1.00 (0.60-1.70)<br/> &gt;1 time/wk: 0.80 (0.50-1.40)</p> <p>(MET-h/wk)</p> <p>Post-diagnosis</p> <p>&lt;3: 1.00<br/> 3-8.9: 0.80 (0.60-1.06)<br/> 9-14.9: 0.50 (0.31-0.82)<br/> 15-23.9: 0.56 (0.38-0.84)<br/> ≥24: 0.60 (0.40-0.89)</p> <p>Pre-diagnosis (BMI&lt;25)</p> <p>&lt;3: 1.00<br/> 3-8.9: 0.65 (0.43-0.97)<br/> 9-14.9: 0.35 (0.18-0.68)<br/> 15-23.9: 0.63 (0.39-1.04)<br/> ≥24: 0.61 (0.37-0.99)</p> <p>Pre-diagnosis (BMI≥25)</p> <p>&lt;3: 1.00<br/> 3-8.9: 1.01 (0.66-1.55)<br/> 9-14.9: 0.81 (0.38-1.72)</p> |  |
| 40 | Holmes (2005)<br>USA <sup>40</sup> | The Nurses' Health Study (NHS) cohort | Female | 30-55 | 463 | 2987 | 8.0 | Breast cancer | Recreational activity | physical | Age, interval between diagnosis and physical activity assessment, body mass index, menopausal status and hormone therapy use, age at first birth and parity, oral contraceptive use, disease stage, radiation treatment, chemotherapy, and tamoxifen treatment,                                                                                                                                                                                                                                                                                                                                                                                                                                                                                                                                                                                                                                                                                                                                                                                                                                                                                                                                                                                                                                                                                                                                       |  |

|    |                                       |                                                 |        |       |     |      |     |                                         |                       |          |                                                                                                                                                                                                                                                                                                                                                                          |                                                                                                                                                                                                                                                                          |
|----|---------------------------------------|-------------------------------------------------|--------|-------|-----|------|-----|-----------------------------------------|-----------------------|----------|--------------------------------------------------------------------------------------------------------------------------------------------------------------------------------------------------------------------------------------------------------------------------------------------------------------------------------------------------------------------------|--------------------------------------------------------------------------------------------------------------------------------------------------------------------------------------------------------------------------------------------------------------------------|
| 41 | Abrahamson (2006) USA <sup>41</sup>   | A follow-up study                               | Female | 20-54 | 212 | 1264 | 8.5 | Breast cancer                           | Recreational activity | physical | 15-23.9: 0.44 (0.21-0.93)<br>≥24: 0.52 (0.26-1.06)<br>(MET-h/wk)<br>Pre-diagnosis<br>1.6-16.6: 1.00<br>16.7-29.4: 0.74 (0.50-1.11)<br>29.5-43.0: 0.97 (0.66-1.41)<br>43.1-98.0: 1.12 (0.78-1.62)                                                                                                                                                                         | Stage and income                                                                                                                                                                                                                                                         |
| 42 | Haydon (2006) Australia <sup>42</sup> | The Melbourne Collaborative Cohort Study (MCCS) | Both   | 25-75 | 181 | 526  | 5.5 | Colorectal cancer                       | Recreational activity | physical | Pre-diagnosis<br>No exercise: 1.00<br>Exercise: 0.73 (0.54-1.00)                                                                                                                                                                                                                                                                                                         | Age, sex, stage                                                                                                                                                                                                                                                          |
| 43 | Meyerhardt (2006) USA <sup>43</sup>   | The Nurses' Health Study (NHS) cohort           | Female | 20-54 | 72  | 554  | 9.6 | Colorectal cancer                       | Recreational activity | physical | (MET-h/wk)<br>Post-diagnosis<br><3: 1.00<br>3-8.9: 0.92 (0.50-1.69)<br>9-17.9: 0.57 (0.27-1.20)<br>≥18: 0.39 (0.18-0.82)<br>Pre-diagnosis<br><3: 1.00<br>3-8.9: 0.83 (0.45-1.53)<br>9-17.9: 1.05 (0.56-1.99)<br>≥18: 0.86 (0.44-1.67)                                                                                                                                    | BMI, stage of disease, grade of tumor differentiation, colon or rectal primary, age at diagnosis, year of diagnosis, receipt of chemotherapy, time from diagnosis to physical activity measurement, change in body mass index before and after diagnosis, smoking status |
| 44 | Holick (2008) USA <sup>44</sup>       | Collaborative Women's Longevity Study (CWLS)    | Female | 20-79 | 109 | 4482 | 5.6 | Breast cancer                           | Recreational activity | physical | (MET-h/wk)<br>Post-diagnosis<br>Overall<br><2.8: 1.00<br>2.8-7.9: 0.62 (0.37-1.03)<br>8.0-20.9: 0.53 (0.31-0.88)<br>≥21.0: 0.44 (0.25-0.76)<br>Moderate<br><2.0: 1.00<br>2.0-3.9: 0.69 (0.43-1.12)<br>4.0-10.2: 0.47 (0.27-0.83)<br>≥10.3: 0.41 (0.24-0.73)<br>Vigorous<br>0: 1.00<br>0.1-5.9: 0.94 (0.55-1.61)<br>6.0-15.0: 1.07 (0.65-1.76)<br>≥15.1: 0.90 (0.47-1.72) | Age at diagnosis, stage of disease at diagnosis, state of residence at diagnosis, and interval between diagnosis and physical activity assessment                                                                                                                        |
| 45 | Sundelof (2008) Sweden <sup>45</sup>  | Swedish Oesophageal and Cardia Cancer study     | Both   | /     | 510 | 580  | 10  | Oesophageal adenocarcinoma, Oesophageal | Recreational activity | physical | Pre-diagnosis<br>Oesophageal adenocarcinoma<br>1 <sup>st</sup> (low): 1.00<br>2 <sup>nd</sup> : 0.90 (0.50-1.50)                                                                                                                                                                                                                                                         | Age, sex, education, symptomatic gastroesophageal reflux, BMI, tobacco smoking.                                                                                                                                                                                          |

|    |                                     |                                                       |        |       |     |      |      |                                                        |                         |          |                                                                                                                                                                  |                                     |                                                                                                                                                                                                                                                                         |
|----|-------------------------------------|-------------------------------------------------------|--------|-------|-----|------|------|--------------------------------------------------------|-------------------------|----------|------------------------------------------------------------------------------------------------------------------------------------------------------------------|-------------------------------------|-------------------------------------------------------------------------------------------------------------------------------------------------------------------------------------------------------------------------------------------------------------------------|
|    |                                     | (SECC study)                                          |        |       |     |      |      | squamous-cell carcinoma, Gastric cardia adenocarcinoma |                         |          | 3 <sup>rd</sup> : 0.70 (0.40-1.20)<br>4 <sup>th</sup> (high): 0.90 (0.50-1.50)                                                                                   | Oesophageal squamous-cell carcinoma | alcohol intake, tumour stage and oesophagectomy                                                                                                                                                                                                                         |
|    |                                     |                                                       |        |       |     |      |      |                                                        |                         |          | 1 <sup>st</sup> (low): 1.00<br>2 <sup>nd</sup> : 1.00 (0.60-1.70)<br>3 <sup>rd</sup> : 0.90 (0.50-1.60)<br>4 <sup>th</sup> (high): 0.80 (0.40-1.50)              | Gastric cardia adenocarcinoma       |                                                                                                                                                                                                                                                                         |
| 46 | Yang (2008) Sweden <sup>46</sup>    | A prospective follow-up study                         | Female | 50-74 | 396 | 635  | 8.0  | Ovarian cancer                                         | Recreational activity   | physical | (h/wk)<br>Pre-diagnosis<br>None: 1.00<br><1: 1.23 (0.87-1.75)<br>1-2: 1.15 (0.85-1.57)<br>>2: 1.18 (0.87-1.61)                                                   |                                     | Age at diagnosis, epithelial ovarian cancer FIGO stage and WHO grade of differentiation                                                                                                                                                                                 |
| 47 | Dal Maso (2008) Italy <sup>47</sup> | A follow-up study carried out in 6 Italian areas      | Female | 23-47 | 398 | 1453 | 12.6 | Breast cancer                                          | Recreational activity   | physical | (h/wk)<br>Pre-diagnosis<br><2: 1.00<br>≥2: 0.85 (0.68-1.07)                                                                                                      |                                     | Region of residence, age at diagnosis, year of diagnosis, TNM stage and ER/PR status                                                                                                                                                                                    |
| 48 | Duffy (2009) USA <sup>48</sup>      | A prospective cohort study                            | Both   | >18   | 166 | 504  | 2.74 | Head and Neck Squamous Cell Carcinoma                  | Total physical activity |          | PASE physical activity score (per 10 points): 0.98 (0.95-1.00)                                                                                                   |                                     | Age, marital status, education, smoking status, alcohol problem, fruit intake, BMI                                                                                                                                                                                      |
| 49 | Meyerhardt (2009) USA <sup>49</sup> | The Health Professional Follow-up Study (HPFS) cohort | Male   | /     | 88  | 668  | 7.8  | Colorectal cancer                                      | Recreational activity   | physical | (MET-h/wk)<br>Post-diagnosis<br>0.0-3.0: 1.00<br>3.1-9.0: 1.06 (0.55-2.08)<br>9.1-18.0: 1.30 (0.65-2.59)<br>18.1-27.0: 0.76 (0.33-1.77)<br>>27: 0.47 (0.24-0.92) |                                     | Age at diagnosis, stage of disease, grade of tumor differentiation, colon or rectal primary, year of diagnosis, body mass index at diagnosis, time from diagnosis to physical activity measurement, change in body mass index prior and after diagnosis, smoking status |
| 50 | Sternfeld (2009) USA <sup>50</sup>  | The life after Cancer Epidemiology (LACE) study       | Female | 18-79 | 102 | 1868 | 7.25 | Breast cancer                                          | Total physical activity |          | Post-diagnosis<br>Total (MET-h/wk)<br><29: 1.00<br>29-44: 1.01 (0.57-1.78)<br>44-62: 0.70 (0.38-1.29)<br>>62: 0.87 (0.48-1.59)                                   |                                     | Age, stage, weigh at 18y, type of treatment, type of surgery                                                                                                                                                                                                            |

|    |                                          |                                   |        |       |     |      |      |               |                       |          |                                                                                                                                                                                                                                                                                                                                                                                                                                                                                                                                             |                                                                                                                                                                                                                                                                                                                                                         |  |
|----|------------------------------------------|-----------------------------------|--------|-------|-----|------|------|---------------|-----------------------|----------|---------------------------------------------------------------------------------------------------------------------------------------------------------------------------------------------------------------------------------------------------------------------------------------------------------------------------------------------------------------------------------------------------------------------------------------------------------------------------------------------------------------------------------------------|---------------------------------------------------------------------------------------------------------------------------------------------------------------------------------------------------------------------------------------------------------------------------------------------------------------------------------------------------------|--|
|    |                                          |                                   |        |       |     |      |      |               |                       |          |                                                                                                                                                                                                                                                                                                                                                                                                                                                                                                                                             | <p>Moderate-vigorous<br/> &lt;5.3: 1.00<br/> 5.3-15: 0.77 (0.44-1.34)<br/> 15-27: 0.47 (0.24-0.91)<br/> &gt;27: 0.90 (0.51-1.58)<br/> Moderate (h/wk)<br/> &lt;1: 1.00<br/> 1-3: 0.65 (0.36-1.26)<br/> 3-6: 0.69 (0.40-1.19)<br/> &gt;6: 0.73 (0.40-1.33)<br/> Vigorous (h/wk)<br/> 0: 1.00<br/> 0-1: 0.79 (0.42-1.48)<br/> &gt;1: 1.10 (0.68-1.80)</p> |  |
| 51 | West-Wright (2009) USA <sup>51</sup>     | The California Teachers Study     | Female | 18-54 | 221 | 3539 | 9    | Breast cancer | Recreational activity | physical | <p>Pre-diagnosis<br/> ≤0.5 h/wk/y of any activity: 1.00<br/> 0.51-3.0 h/wk/y of moderate or strenuous activity: 0.65 (0.45-0.93)<br/> &gt;3.0 h/wk/y either activity type: 0.53 (0.35-0.80)</p>                                                                                                                                                                                                                                                                                                                                             | Race, BMI, total caloric intake, number of comorbid conditions, and estrogen receptor status                                                                                                                                                                                                                                                            |  |
| 52 | Friedenreich (2009) Canada <sup>52</sup> | A prospective cohort study        | Female | /     | 223 | 1231 | 10.3 | Breast cancer | Recreational activity | physical | <p>(MET-h/wk)<br/> Recreational<br/> ≤5: 1.00<br/> 5-10: 0.68 (0.47-0.98)<br/> 10-19: 0.65 (0.45-0.94)<br/> &gt;19: 0.54 (0.36-0.79)<br/> Total<br/> ≤95: 1.00<br/> 95-120: 0.70 (0.47-1.04)<br/> 120-150: 0.81 (0.56-1.18)<br/> &gt;151: 0.79 (0.53-1.17)<br/> Household<br/> ≤5: 1.00<br/> 5-10: 0.70 (0.47-1.04)<br/> 10-19: 0.81 (0.56-1.18)<br/> &gt;19: 0.79 (0.53-1.17)<br/> Moderate<br/> 0-1.4: 1.00<br/> 1.4-3.9: 0.67 (0.50-0.91)<br/> ≥3.9: 0.56 (0.38-0.82)<br/> Vigorous<br/> &lt;0.03: 1.00<br/> ≥0.03: 0.74 (0.56-0.98)</p> | Age, tumor stage, treatment (chemotherapy, hormone therapy and radiation therapy), SBR grade, BMI and other comorbidity conditions                                                                                                                                                                                                                      |  |
| 53 | Hellmann (2010) Denmark <sup>53</sup>    | Copenhagen City Heart Study(CCHS) | Female | /     | 323 | 528  | 7.8  | Breast cancer | Recreational activity | physical | <p>Pre-diagnosis (h/wk)<br/> Inactive &lt;2: 1.00</p>                                                                                                                                                                                                                                                                                                                                                                                                                                                                                       | Alcohol, smoking, physical activity, body mass index, hormone                                                                                                                                                                                                                                                                                           |  |

|    |                                      |                                     |        |       |     |      |     |                   |                       |          |                                                                                                                                                                                                                                                                                                                                                                                                                                                 |                                                                                                                                                                                       |                                                                                                       |
|----|--------------------------------------|-------------------------------------|--------|-------|-----|------|-----|-------------------|-----------------------|----------|-------------------------------------------------------------------------------------------------------------------------------------------------------------------------------------------------------------------------------------------------------------------------------------------------------------------------------------------------------------------------------------------------------------------------------------------------|---------------------------------------------------------------------------------------------------------------------------------------------------------------------------------------|-------------------------------------------------------------------------------------------------------|
|    |                                      |                                     |        |       |     |      |     |                   |                       |          |                                                                                                                                                                                                                                                                                                                                                                                                                                                 | Moderate 2-4: 0.83 (0.55-1.87)<br>High >4: 1.01 (0.62-1.63)                                                                                                                           | replacement therapy, age, disease stage, menopausal status, parity, education, and adjuvant treatment |
| 54 | Keegan (2010) USA <sup>54</sup>      | A population-based follow-up study  | Female | 18-69 | 605 | 3833 | 7.8 | Breast cancer     | Recreational activity | physical | Pre-diagnosis (MET-h/wk)<br>≤6.7: 1.00<br>6.8-16.3: 0.86 (0.67-1.11)<br>16.4-26.1: 0.84 (0.64-1.10)<br>26.2-46.0: 0.88 (0.68-1.14)<br>>46.0: 0.93 (0.72-1.21)                                                                                                                                                                                                                                                                                   | Study center, age of diagnosis, race/ethnicity, number of affected nodes, BMI, time since last full term pregnancy, ER status, PR status, tumor grade, tumor size, and tumor type     |                                                                                                       |
| 55 | Emaus (2010) Norway <sup>55</sup>    | Norwegian Counties Study            | Female | 27-79 | 355 | 1364 | 8.2 | Breast cancer     | Recreational activity | physical | Pre-diagnosis<br>Sedentary: 1.00<br>Moderate: 0.92 (0.71-1.19)<br>Hard: 0.75 (0.49-1.15)                                                                                                                                                                                                                                                                                                                                                        | Age at diagnosis, pre-diagnostic observation time, tumor stage, region of residence (strata), year at diagnosis before and after 1995 (strata), and BMI                               |                                                                                                       |
| 56 | Baade (2011) Australia <sup>56</sup> | A longitudinal study                | Both   | 21-82 | 345 | 1825 | 4.9 | Colorectal cancer | Recreational activity | physical | Post-diagnosis (Min/wk)<br>0: 1.00<br>1-149: 0.90 (0.69-1.17)<br>≥150: 0.88 (0.68-1.15)                                                                                                                                                                                                                                                                                                                                                         | Sex, age, BMI, smoking status, marital status, education level, private health insurance, site, stage of disease, treatment, comorbidities                                            |                                                                                                       |
| 57 | Irwin (2011) USA <sup>57</sup>       | The Women's Health Initiative (WHI) | Female | 50-79 | 194 | 4646 | 6   | Breast cancer     | Recreational activity | physical | (MET-h/wk)<br>Pre-diagnosis<br>Moderate-vigorous<br>0: 1.00<br>0.1-3.0: 0.83 (0.51-1.37)<br>3.1-8.9: 0.82 (0.55-1.22)<br>≥9: 0.71 (0.49-1.03)<br>Moderate<br>0: 1.00<br>0.1-3.0: 0.91 (0.58-1.41);<br>3.1-8.9: 0.87 (0.60-1.25)<br>≥9: 0.60 (0.40-0.90)<br>Post-diagnosis<br>Moderate-vigorous<br>0: 1.00<br>0.1-3.0: 0.30 (0.09-0.99)<br>3.1-8.9: 0.77 (0.43-1.38)<br>≥9: 0.61 (0.35-0.99)<br>Moderate<br>0: 1.00<br>0.1-3.0: 0.37 (0.15-0.94) | Age, ethnicity, stage, WHI study arm, previous hormone therapy use, BMI, diabetes, alcohol, smoke, total calories, percentage calories from fat, and servings of fruit and vegetables |                                                                                                       |



|    |                                         |                                                                                                                                                              |        |   |     |           |      |                   |                                |                                                                                                                                                                           |                                                                                                                                                                                                                                                                                                                                              |                                                                                                                                                         |
|----|-----------------------------------------|--------------------------------------------------------------------------------------------------------------------------------------------------------------|--------|---|-----|-----------|------|-------------------|--------------------------------|---------------------------------------------------------------------------------------------------------------------------------------------------------------------------|----------------------------------------------------------------------------------------------------------------------------------------------------------------------------------------------------------------------------------------------------------------------------------------------------------------------------------------------|---------------------------------------------------------------------------------------------------------------------------------------------------------|
| 58 | Kenfield (2011) USA <sup>58</sup>       | The Health Professionals Follow-Up Study                                                                                                                     | Male   | / | 112 | 2705      | 9.7  | Prostate cancer   | Recreational physical activity | 3.1-8.9: 0.71 (0.42-1.20)<br>≥9: 0.51 (0.30-0.87)                                                                                                                         | Post-diagnosis Total (MET-h/wk)<br><3: 1.00<br>3-9: 0.91 (0.48-1.73)<br>9-24: 0.60 (0.32-1.11)<br>24-48: 0.83 (0.44-1.55)<br>≥48: 0.42 (0.20-0.88)<br>Vigorous (h/wk)<br>1: 1.00<br>1-3: 1.13 (0.70-1.83)<br>≥3: 0.39 (0.18-0.84)                                                                                                            | Age at diagnosis, months since diagnosis, clinical stage, Gleason score, treatment, and post-diagnosis body mass index, pre-diagnosis physical activity |
| 59 | Morikawa (2011) USA <sup>59</sup>       | The Nurses' Health Study and the Health Professionals Follow-up Study                                                                                        | Both   | / | 68  | 955       | 11.8 | Colorectal cancer | Recreational activity          | Post-diagnosis (MET-h/wk)<br>Negative Nuclear CTNNB1 Status<br><18: 1.00<br>≥18: 0.33 (0.13-0.81)<br>Positive Nuclear CTNNB1 Status<br><18: 1.00<br>≥18: 1.07 (0.50-2.30) | The CTNNB1 variable, age, sex, body mass index, tumor location, tumor differentiation, family history of colorectal cancer in any first-degree relative, microsatellite instability, CpG island methylator phenotype, mutations in KRAS, BRAF, or PIK3CA, level of long interspersed nucleotide element 1 methylation, and tumor protein p53 |                                                                                                                                                         |
| 60 | Beasley (2012) USA, China <sup>60</sup> | LACE (the Life After Cancer Epidemiology), NHS (Nurses' Health Study), SBCSS(Shanghai Breast Cancer Survival Study), WHEL(Women's Healthy Eating and Living) | Female | / | 971 | 1128<br>2 |      | Breast cancer     | Recreational physical activity | Post-diagnosis (MET-h/wk)<br>0-0.2: 1.00<br>2.3-4.9: 1.00 (0.71-1.06)<br>8.0-11.9: 0.87 (0.60-0.91)<br>16.2-21.4: 0.74 (0.59-0.91)<br>29.7-48.0: 0.73 (0.59-0.91)         | Age at diagnosis, race, menopausal status, TNM stage, hormone receptor status, treatment, post-diagnosis body mass index, and smoking status                                                                                                                                                                                                 |                                                                                                                                                         |

|    |                                    |                                             |        |       |     |      |      |                    |                       |          |                                                                                                                                                                                                                                                                                                       |                                                                                                                                                  |
|----|------------------------------------|---------------------------------------------|--------|-------|-----|------|------|--------------------|-----------------------|----------|-------------------------------------------------------------------------------------------------------------------------------------------------------------------------------------------------------------------------------------------------------------------------------------------------------|--------------------------------------------------------------------------------------------------------------------------------------------------|
| 61 | Cleveland (2012) USA <sup>61</sup> | The Long Island Breast Cancer Study Project | Female | /     | 120 | 1273 | 5.56 | Breast cancer      | Recreational activity | physical | Pre-diagnosis (MET-h/wk)<br>Total<br>0: 1.00<br>0-9: 0.61 (0.40-0.92)<br>≥9: 0.66 (0.42-1.06)<br>Moderate<br>0: 1.00<br>0-9: 0.60 (0.39-0.91)<br>≥9: 0.73 (0.44-1.20)<br>Vigorous<br>0: 1.00<br>0-9: 1.61 (0.75-1.79)<br>≥9: 0.83 (0.59-0.91)                                                         | Age at diagnosis, body mass index and menopausal status                                                                                          |
| 62 | Kuiper (2012) USA <sup>62</sup>    | WHI(The Women's Health Initiative)          | Female | 50-79 | 171 | 1339 | 11.9 | Colorectal cancer  | Recreational activity | physical | (MET-h/wk)<br>Pre-diagnosis<br>0: 1.00<br>0-2.9: 0.98 (0.58-1.66)<br>3.0-8.9: 1.01 (0.65-1.57)<br>9.0-17.9: 0.74 (0.46-1.20)<br>≥18.0: 0.68 (0.41-1.13)<br>Post-diagnosis<br>0: 1.00<br>0-2.9: 0.49 (0.21-1.14)<br>3.0-8.9: 0.30 (0.12-0.73)<br>9.0-17.9: 0.53 (0.22-1.25)<br>≥18.0: 0.29 (0.11-0.77) | Age at diagnosis, study arm, BMI, tumor stage, ethnicity, education, alcohol, smoking, and hormone therapy use                                   |
| 63 | Arem (2013) USA <sup>63</sup>      | WHI(The Women's Health Initiative)          | Female | 50-79 | 66  | 983  | 5.3  | Endometrial cancer | Recreational activity | physical | Pre-diagnosis (MET-h/wk)<br>0: 1.00<br>0-11.26: 0.51 (0.26-1.01)<br>≥11.26: 1.05 (0.79-1.38)                                                                                                                                                                                                          | Age, BMI, tumor grade, tumor stage, and age at menarche, and lag time from baseline measure to endometrial cancer diagnosis                      |
| 64 | Arem (2013) USA <sup>64</sup>      | The NIH-AARP Diet and Health Study          | Female | 50-71 | 133 | 1400 | 13   | Endometrial cancer | Recreational activity | physical | Pre-diagnosis (h/wk)<br>Moderate-vigorous<br>Never/rarely: 1.00<br><1: 1.26 (0.59-2.70)<br>1-3: 0.45 (0.19-1.04)<br>4-7: 0.96 (0.46-2.03)<br>>7: 0.91 (0.43-1.93)                                                                                                                                     | Tumor grade, tumor stage, surgery, chemotherapy, race, family history of breast cancer, diabetes, smoking status, and continuous body mass index |
| 65 | Campbell (2013) USA <sup>65</sup>  | CPS-II                                      | Both   | /     | 379 | 2293 | 8.1  | Colorectal cancer  | Recreational activity | physical | (MET-h/wk)<br>Pre-diagnosis<br><3.5: 1.00                                                                                                                                                                                                                                                             | Age at diagnosis, sex, smoking status, body mass index, red meat                                                                                 |

|    |                                         |                                                      |        |       |     |      |      |                      |                          |          |                                                                                                                                                     |                                                                                                                                                                                                                                                                                                                                                                                                                      |                                                                                                                                                                                                                                                                                                                              |
|----|-----------------------------------------|------------------------------------------------------|--------|-------|-----|------|------|----------------------|--------------------------|----------|-----------------------------------------------------------------------------------------------------------------------------------------------------|----------------------------------------------------------------------------------------------------------------------------------------------------------------------------------------------------------------------------------------------------------------------------------------------------------------------------------------------------------------------------------------------------------------------|------------------------------------------------------------------------------------------------------------------------------------------------------------------------------------------------------------------------------------------------------------------------------------------------------------------------------|
|    |                                         |                                                      |        |       |     |      |      |                      |                          |          |                                                                                                                                                     | 3.5-8.75: 0.68 (0.49-0.95)<br>≥8.75: 0.78 (0.57-1.08)<br>Post-diagnosis<br><3.5: 1.00<br>3.5-8.75: 1.00 (0.64-1.56)<br>≥8.75: 0.87 (0.61-1.24)<br>Post-diagnosis<br>(MET-h/wk)<br><3: 1.00<br>3-17.9: 0.85 (0.58-1.23)<br>≥18: 0.71 (0.46-1.11)                                                                                                                                                                      | intake, Surveillance,<br>Epidemiology, and End<br>Results (SEER) summary<br>stage at diagnosis,<br>leisure-time spent sitting,<br>and education<br>Sex, age, body mass<br>index (BMI), depth of<br>invasion through bowel<br>wall, number of positive<br>lymph nodes, baseline<br>performance status, and<br>treatment group |
| 66 | Jeon (2013)<br>National <sup>66</sup>   | GALGB                                                | Female | /     | 169 | 237  | 7.3  | Colorectal<br>cancer | Recreational<br>activity | physical |                                                                                                                                                     |                                                                                                                                                                                                                                                                                                                                                                                                                      |                                                                                                                                                                                                                                                                                                                              |
| 67 | Schmidt (2013)<br>Germany <sup>67</sup> | MARIE study                                          | Female | 50-74 | 367 | 3393 | 5.6  | Breast cancer        | Recreational<br>activity | physical | Pre-diagnosis<br>(MET-h/week)<br>None: 1.00<br><12: 0.74 (0.51-1.08)<br>12-24: 0.82 (0.55-1.22)<br>24-42: 0.97 (0.65-1.44)<br>≥42: 0.80 (0.53-1.21) | Tumor size, nodal status,<br>tumor grading, ER/PR<br>status, radiotherapy,<br>screening-detected tumor,<br>HT use at diagnosis, age<br>at diagnosis, BMI<br>pre-diagnosis, smoking<br>status and pack years and<br>pre-existing angina<br>pectoris. In addition,<br>models for overall<br>mortality and for other<br>deaths were adjusted for<br>pre-existing hypertension,<br>previous stroke and use of<br>insulin |                                                                                                                                                                                                                                                                                                                              |
| 68 | Tao (2013)<br>USA <sup>68</sup>         | WEB study                                            | Female | 35-79 | 170 | 1170 | 7.28 | Breast cancer        | Total physical activity  |          | Pre-diagnosis<br>(h/wk)<br><3: 1.00<br>3-6: 0.64 (0.36-1.13)<br>>6: 0.62 (0.34-1.11)                                                                | Age at diagnosis,<br>education, BMI,<br>menopausalstatus, TNM,<br>radiotherapy,<br>chemotherapy, hormonal<br>therapy, p53 mutation,<br>HER2 status,ER status,<br>and PR status                                                                                                                                                                                                                                       |                                                                                                                                                                                                                                                                                                                              |
| 69 | Bradshaw (2014)<br>USA <sup>69</sup>    | The Long<br>Island Breast<br>Cancer Study<br>Project | Female | 25-91 | 195 | 1436 | 12.7 | Breast cancer        | Recreational<br>activity | physical | Post-diagnosis<br>(MET-h/wk)<br>0: 1.00<br>0.1-9: 0.24 (0.07-0.65)<br>>9: 0.27 (0.15-0.46)                                                          | Age, pre-diagnosis BMI,<br>chemotherapy treatment,<br>tumor size                                                                                                                                                                                                                                                                                                                                                     |                                                                                                                                                                                                                                                                                                                              |
| 70 | Pelser (2014)<br>USA <sup>70</sup>      | NIH-AARP<br>Diet and<br>Health Study                 | Both   | 50-71 | 856 | 5727 | 5    | Colorectal<br>cancer | Recreational<br>activity | physical | Pre-diagnosis<br>Colon<br>Never or rarely: 1.00<br>1-3 time/month: 0.96 (0.76-1.22)                                                                 | Lag time, sex, education,<br>family history of colon<br>cancer, cancer stage, first<br>course of treatment, and                                                                                                                                                                                                                                                                                                      |                                                                                                                                                                                                                                                                                                                              |

|    |                               |                                          |        |       |     |     |      |                |                       |          |                                                                                                                                                                                      |                                                                                                                                                                                                                                                         |
|----|-------------------------------|------------------------------------------|--------|-------|-----|-----|------|----------------|-----------------------|----------|--------------------------------------------------------------------------------------------------------------------------------------------------------------------------------------|---------------------------------------------------------------------------------------------------------------------------------------------------------------------------------------------------------------------------------------------------------|
|    |                               |                                          |        |       |     |     |      |                |                       |          | 1-2 time/wk: 0.89 (0.72-1.11)<br>3-5 time/wk: 0.98 (0.79-1.21)<br>>5 times/wk: 1.16 (0.93-1.45)                                                                                      | also mutually adjusted for quintiles of HEI-2005 scores, BMI, physical activity, alcohol, and smoking history                                                                                                                                           |
|    |                               |                                          |        |       |     |     |      |                |                       |          | Rectal<br>Never or rarely: 1.00<br>1-3 time/month: 1.23(0.84-1.80)<br>1-2 time/wk: 0.92 (0.64-1.31)<br>3-5 time/wk: 0.95 (0.66-1.37)<br>>5 times/wk: 0.78 (0.53-1.15)                |                                                                                                                                                                                                                                                         |
| 71 | Zhou (2014) USA <sup>71</sup> | The Women's Health Initiative (WHI)Study | Female | 50-79 | 301 | 600 | 10.9 | Ovarian cancer | Recreational activity | physical | Pre-diagnosis (MET-h/wk)<br>Vigorous<br>0: 1.00<br>>0: 0.74 (0.56-0.98)<br>Moderate-vigorous:<br>0: 1.00<br>0-9: 1.07 (0.79-1.44)<br>9-15: 0.68 (0.45-1.03)<br>>15: 0.89 (0.65-1.23) | Age, stage, histology, time from study enrollment to ovarian cancer diagnosis, BMI, hormone therapy use, smoking, history of diabetes and status in calcium and vitamin D trial, diet modification trial, hormone therapy trial and observational study |

Abbreviations: MET=Metabolic equivalents of task; BMI=body mass index

### Supplementary References

- 1 Arraiz GA, Wigle DT, Mao Y. Risk assessment of physical activity and physical fitness in the Canada Health Survey mortality follow-up study. *J Clin Epidemiol* 1992;45:419-28.
- 2 Kampert JB, Blair SN, Barlow CE, *et al.* Physical activity, physical fitness, and all-cause and cancer mortality: a prospective study of men and women. *Ann Epidemiol* 1996;6:452-7.
- 3 Rosengren A, Wilhelmsen L. Physical activity protects against coronary death and deaths from all causes in middle-aged men. Evidence from a 20-year follow-up of the primary prevention study in Goteborg. *Ann Epidemiol* 1997;7:69-75.
- 4 Smith G, Shipley MJ, Batty GD, *et al.* Physical activity and cause-specific mortality in the Whitehall study. *Public Health* 2000;114:308-15.
- 5 Batty GD, Shipley MJ, Marmot M, *et al.* Physical activity and cause-specific mortality in men: further evidence from the Whitehall study. *Eur J Epidemiol* 2001;17:863-9.
- 6 Kilander L, Berglund L, Boberg M, *et al.* Education, lifestyle factors and mortality from cardiovascular disease and cancer. A 25-year follow-up of Swedish 50-year-old men. *Int J Epidemiol* 2001;30:1119-26.

- 7 Lee SY, Kim MT, Jee SH, *et al.* Does hypertension increase mortality risk from lung cancer? A prospective cohort study on smoking, hypertension and lung cancer risk among Korean men. *J Hypertens* 2002 20:617-22.
- 8 Lee IM, Sesso HD, Oguma Y, *et al.* Physical activity, body weight, and pancreatic cancer mortality. *Br J Cancer* 2003;88:679-83.
- 9 Hu G, Tuomilehto J, Silventoinen K, *et al.* The effects of physical activity and body mass index on cardiovascular, cancer and all-cause mortality among 47 212 middle-aged Finnish men and women. *Int J Obes (Lond)* 2005;29:894-902.
- 10 Nilsen TI, Romundstad PR, Vatten LJ. Recreational physical activity and risk of prostate cancer: A prospective population-based study in Norway (the HUNT study). *Int J Cancer* 2006;119:2943-7.
- 11 Schnohr P, Lange P, Scharling H, *et al.* Long-term physical activity in leisure time and mortality from coronary heart disease, stroke, respiratory diseases, and cancer. The Copenhagen City Heart Study. *Eur J Cardiovasc Prev Rehabil* 2006;13:173-9.
- 12 Huxley R. The role of lifestyle risk factors on mortality from colorectal cancer in populations of the Asia-Pacific region. *Asian Pac J Cancer Prev* 2007;8:191-8.
- 13 Lin Y, Kikuchi S, Tamakoshi A, *et al.* Obesity, physical activity and the risk of pancreatic cancer in a large Japanese cohort. *Int J Cancer* 2007;120:2665-71.
- 14 Matthews CE, Jurj AL, Shu XO, *et al.* Influence of exercise, walking, cycling, and overall nonexercise physical activity on mortality in Chinese women. *Am J Epidemiol* 2007;165:1343-50.
- 15 Orsini N, Bellocco R, Bottai M, *et al.* Combined effects of obesity and physical activity in predicting mortality among men. *J Intern Med* 2008 264:442-51.
- 16 van Dam RM, Li T, Spiegelman D, *et al.* Combined impact of lifestyle factors on mortality: prospective cohort study in US women. *BMJ* 2008 337:a1440.
- 17 Orsini N, Bellocco R, Bottai M, *et al.* A prospective study of lifetime physical activity and prostate cancer incidence and mortality. *Br J Cancer* 2009;101:1932-8.
- 18 Stevens RJ, Roddam AW, Spencer EA, *et al.* Factors associated with incident and fatal pancreatic cancer in a cohort of middle-aged women. *Int J Cancer* 2009 124:2400-5.
- 19 Autenrieth CS, Baumert J, Baumeister SE, *et al.* Association between domains of physical activity and all-cause, cardiovascular and cancer mortality. *Eur J Epidemiol* 2011;26:91-9.
- 20 Batty GD, Kivimaki M, Clarke R, *et al.* Modifiable risk factors for prostate cancer mortality in London: forty years of follow-up in the Whitehall study. *Cancer Causes Control* 2011;22:311-8.
- 21 Borch KB, Braaten T, Lund E, *et al.* Physical activity and mortality among Norwegian women - the Norwegian Women and Cancer Study. *Clin Epidemiol* 2011;3:229-35.
- 22 Laukkanen JA, Rauramaa R, Makikallio TH, *et al.* Intensity of leisure-time physical activity and cancer mortality in men. *Br J Sports Med* 2011;45:125-9.
- 23 McCullough ML, Patel AV, Kushi LH, *et al.* Following cancer prevention guidelines reduces risk of cancer, cardiovascular disease, and all-cause mortality. *Cancer*

*Epidemiol Biomarkers Prev* 2011;20:1089-97.

- 24 Morrison DS, Batty GD, Kivimaki M, *et al.* Risk factors for colonic and rectal cancer mortality: evidence from 40 years' follow-up in the Whitehall I study. *J Epidemiol Community Health* 2011;65:1053-8.
- 25 Nakamura K, Nagata C, Wada K, *et al.* Cigarette smoking and other lifestyle factors in relation to the risk of pancreatic cancer death: a prospective cohort study in Japan. *Jpn J Clin Oncol* 2011;41:225-31.
- 26 Wen CP, Wai JP, Tsai MK, *et al.* Minimum amount of physical activity for reduced mortality and extended life expectancy: a prospective cohort study. *Lancet* 2011;378:1244-53.
- 27 Mok Y, Won S, Kimm H, *et al.* Physical Activity Level and Risk of Death: The Severance Cohort Study. *J Epidemiol* 2012.
- 28 Parekh N, Lin Y, Craft LL, *et al.* Longitudinal associations of leisure-time physical activity and cancer mortality in the Third National Health and Nutrition Examination Survey (1986-2006). *J Obes* 2012;2012:518358.
- 29 Sahlqvist S, Goodman A, Simmons RK, *et al.* The association of cycling with all-cause, cardiovascular and cancer mortality: findings from the population-based EPIC-Norfolk cohort. *BMJ Open* 2013;3:e003797.
- 30 Vergnaud AC, Romaguera D, Peeters PH, *et al.* Adherence to the World Cancer Research Fund/American Institute for Cancer Research guidelines and risk of death in Europe: results from the European Prospective Investigation into Nutrition and Cancer cohort study1,4. *Am J Clin Nutr* 2013;97:1107-20.
- 31 Wang N, Zhang X, Xiang YB, *et al.* Associations of Tai Chi, walking, and jogging with mortality in Chinese men. *Am J Epidemiol* 2013;178:791-6.
- 32 Williams PT. Breast cancer mortality vs. exercise and breast size in runners and walkers. *PLoS One* 2013;8:e80616.
- 33 Yu R, Leung J, Woo J. Housework reduces all-cause and cancer mortality in Chinese men. *PLoS One* 2013;8:e61529.
- 34 Arem H, Moore SC, Park Y, *et al.* Physical activity and cancer-specific mortality in the NIH-AARP Diet and Health Study cohort. *Int J Cancer* 2014;135:423-31.
- 35 Hastert TA, Beresford SA, Sheppard L, *et al.* Adherence to the WCRF/AICR cancer prevention recommendations and cancer-specific mortality: results from the Vitamins and Lifestyle (VITAL) Study. *Cancer Causes Control* 2014;25:541-52.
- 36 Wannner M, Tarnutzer S, Martin BW, *et al.* Impact of different domains of physical activity on cause-specific mortality: a longitudinal study. *Prev Med* 2014;62:89-95.
- 37 Rohan TE, Fu W, Hiller JE. Physical activity and survival from breast cancer. *Eur J Cancer Prev* 1995;4:419-24.
- 38 Enger SM, Bernstein L. Exercise activity, body size and premenopausal breast cancer survival. *Br J Cancer* 2004;90:2138-41.
- 39 Borugian MJ, Sheps SB, Kim-Sing C, *et al.* Insulin, macronutrient intake, and physical activity: are potential indicators of insulin resistance associated with mortality from breast cancer? *Cancer Epidemiol Biomarkers Prev* 2004 13:1163-72.
- 40 Holmes MD, Chen WY, Feskanich D, *et al.* Physical activity and survival after breast cancer diagnosis. *JAMA* 2005 293:2479-86.

- 41 Abrahamson PE, Gammon MD, Lund MJ, *et al.* Recreational physical activity and survival among young women with breast cancer. *Cancer* 2006;107:1777-85.
- 42 Haydon AM, Macinnis RJ, English DR, *et al.* Effect of physical activity and body size on survival after diagnosis with colorectal cancer. *Gut* 2006;55:62-7.
- 43 Meyerhardt JA, Giovannucci EL, Holmes MD, *et al.* Physical activity and survival after colorectal cancer diagnosis. *J Clin Oncol* 2006;24:3527-34.
- 44 Holick CN, Newcomb PA, Trentham-Dietz A, *et al.* Physical activity and survival after diagnosis of invasive breast cancer. *Cancer Epidemiol Biomarkers Prev* 2008;17:379-86.
- 45 Sundelof M, Lagergren J, Ye W. Patient demographics and lifestyle factors influencing long-term survival of oesophageal cancer and gastric cardia cancer in a nationwide study in Sweden. *Eur J Cancer* 2008;44:1566-71.
- 46 Yang L, Klint A, Lambe M, *et al.* Predictors of ovarian cancer survival: a population-based prospective study in Sweden. *Int J Cancer* 2008;123:672-9.
- 47 Dal Maso L, Zucchetto A, Talamini R, *et al.* Effect of obesity and other lifestyle factors on mortality in women with breast cancer. *Int J Cancer* 2008 123:2188-94.
- 48 Duffy SA, Ronis DL, McLean S, *et al.* Pretreatment health behaviors predict survival among patients with head and neck squamous cell carcinoma. *J Clin Oncol* 2009;27:1969-75.
- 49 Meyerhardt JA, Giovannucci EL, Ogino S, *et al.* Physical activity and male colorectal cancer survival. *Arch Intern Med* 2009;169:2102-8.
- 50 Sternfeld B, Weltzien E, Quesenberry CP, Jr., *et al.* Physical activity and risk of recurrence and mortality in breast cancer survivors: findings from the LACE study. *Cancer Epidemiol Biomarkers Prev* 2009;18:87-95.
- 51 West-Wright CN, Henderson KD, Sullivan-Halley J, *et al.* Long-term and recent recreational physical activity and survival after breast cancer: the California Teachers Study. *Cancer Epidemiol Biomarkers Prev* 2009;18:2851-9.
- 52 Friedenreich CM, Gregory J, Kopciuk KA, *et al.* Prospective cohort study of lifetime physical activity and breast cancer survival. *Int J Cancer* 2009 124:1954-62.
- 53 Hellmann SS, Thygesen LC, Tolstrup JS, *et al.* Modifiable risk factors and survival in women diagnosed with primary breast cancer: results from a prospective cohort study. *Eur J Cancer Prev* 2010;19:366-73.
- 54 Keegan TH, Milne RL, Andrulis IL, *et al.* Past recreational physical activity, body size, and all-cause mortality following breast cancer diagnosis: results from the Breast Cancer Family Registry. *Breast Cancer Res Treat* 2010;123:531-42.
- 55 Emaus A, Veierod MB, Tretli S, *et al.* Metabolic profile, physical activity, and mortality in breast cancer patients. *Breast Cancer Res Treat* 2010 121:651-60.
- 56 Baade PD, Meng X, Youl PH, *et al.* The impact of body mass index and physical activity on mortality among patients with colorectal cancer in Queensland, Australia. *Cancer Epidemiol Biomarkers Prev* 2011;20:1410-20.
- 57 Irwin ML, McTiernan A, Manson JE, *et al.* Physical activity and survival in postmenopausal women with breast cancer: results from the women's health initiative. *Cancer Prev Res (Phila)* 2011;4:522-9.

- 58 Kenfield SA, Stampfer MJ, Giovannucci E, *et al.* Physical activity and survival after prostate cancer diagnosis in the health professionals follow-up study. *J Clin Oncol* 2011;29:726-32.
- 59 Morikawa T, Kuchiba A, Yamauchi M, *et al.* Association of CTNNB1 (beta-catenin) alterations, body mass index, and physical activity with survival in patients with colorectal cancer. *JAMA* 2011;305:1685-94.
- 60 Beasley JM, Kwan ML, Chen WY, *et al.* Meeting the physical activity guidelines and survival after breast cancer: findings from the after breast cancer pooling project. *Breast Cancer Res Treat* 2012;131:637-43.
- 61 Cleveland RJ, Eng SM, Stevens J, *et al.* Influence of prediagnostic recreational physical activity on survival from breast cancer. *Eur J Cancer Prev* 2012;21:46-54.
- 62 Kuiper JG, Phipps AI, Neuhauser ML, *et al.* Recreational physical activity, body mass index, and survival in women with colorectal cancer. *Cancer Causes Control* 2012.
- 63 Arem H, Chlebowski R, Stefanick ML, *et al.* Body mass index, physical activity, and survival after endometrial cancer diagnosis: results from the Women's Health Initiative. *Gynecol Oncol* 2013;128:181-6.
- 64 Arem H, Park Y, Pelsler C, *et al.* Prediagnosis body mass index, physical activity, and mortality in endometrial cancer patients. *J Natl Cancer Inst* 2013;105:342-9.
- 65 Campbell PT, Patel AV, Newton CC, *et al.* Associations of recreational physical activity and leisure time spent sitting with colorectal cancer survival. *J Clin Oncol* 2013;31:876-85.
- 66 Jeon J, Sato K, Niedzwiecki D, *et al.* Impact of Physical Activity After Cancer Diagnosis on Survival in Patients With Recurrent Colon Cancer: Findings From CALGB 89803/Alliance. *Clin Colorectal Cancer* 2013.
- 67 Schmidt ME, Chang-Claude J, Vrieling A, *et al.* Association of pre-diagnosis physical activity with recurrence and mortality among women with breast cancer. *Int J Cancer* 2013;133:1431-40.
- 68 Tao MH, Hainaut P, Marian C, *et al.* Association of prediagnostic physical activity with survival following breast cancer diagnosis: influence of TP53 mutation status. *Cancer Causes Control* 2013.
- 69 Bradshaw PT, Ibrahim JG, Khankari N, *et al.* Post-diagnosis physical activity and survival after breast cancer diagnosis: the Long Island Breast Cancer Study. *Breast Cancer Res Treat* 2014;145:735-42.
- 70 Pelsler C, Arem H, Pfeiffer RM, *et al.* Prediagnostic lifestyle factors and survival after colon and rectal cancer diagnosis in the National Institutes of Health (NIH)-AARP Diet and Health Study. *Cancer* 2014;120:1540-7.
- 71 Zhou Y, Chlebowski R, LaMonte MJ, *et al.* Body mass index, physical activity, and mortality in women diagnosed with ovarian cancer: results from the Women's Health Initiative. *Gynecol Oncol* 2014;133:4-10.
