# Supplementary material for: The dose–response effect of physical activity on cancer mortality: findings from 71 prospective cohort studies
Source: HighWire-hosted journal article supplement (doi:10.1136/bjsports-2015-094927), 2015-09-18
Supplement: bjsports-2015-094927supp_table2.pdf [file bjsports-2015-094927supp_table2.pdf]

**Supplementary table S2** Dose-response relation between recreational physical activity and cancer mortality in the general population

|                              | Number of datasets included | Recreational physical activity (MET-h/wk) |                 |                 |                 |                 |                 | <i>P</i> for non-linearity |
|------------------------------|-----------------------------|-------------------------------------------|-----------------|-----------------|-----------------|-----------------|-----------------|----------------------------|
|                              |                             | 0                                         | 5               | 10              | 15              | 20              | 25              |                            |
| Overall                      | 11                          | 1.00                                      | 0.88(0.84-0.93) | 0.86(0.82-0.90) | 0.86(0.81-0.91) | 0.85(0.80-0.90) | 0.84(0.78-0.84) | 0.006                      |
| Location                     |                             |                                           |                 |                 |                 |                 |                 |                            |
| Asia                         | 8                           | 1.00                                      | 0.91(0.88-0.95) | 0.87(0.84-0.92) | 0.86(0.81-0.91) | 0.85(0.79-0.91) | 0.84(0.76-0.90) | 0.066                      |
| Duration of follow-up(year)  |                             |                                           |                 |                 |                 |                 |                 |                            |
| < 10                         | 8                           | 1.00                                      | 0.91(0.87-0.95) | 0.87(0.84-0.92) | 0.86(0.83-0.92) | 0.85(0.80-0.92) | 0.83(0.78-0.90) | 0.066                      |
|                              |                             | Recreational physical activity (h/wk)     |                 |                 |                 |                 |                 |                            |
|                              |                             | 0                                         | 2               | 3               | 4               | 6               | 8               |                            |
| Overall                      | 25                          | 1.00                                      | 0.94(0.90-0.97) | 0.92(0.89-0.96) | 0.91(0.88-0.95) | 0.91(0.88-0.94) | 0.90(0.87-0.94) | 0.024                      |
| Location                     |                             |                                           |                 |                 |                 |                 |                 |                            |
| North America                | 20                          | 1.00                                      | 0.93(0.89-0.96) | 0.93(0.89-0.95) | 0.92(0.88-0.95) | 0.89(0.86-0.92) | 0.94(0.92-0.95) | 0.008                      |
| Duration of follow-up (year) |                             |                                           |                 |                 |                 |                 |                 |                            |
| ≥10                          | 25                          | 1.00                                      | 0.94(0.90-0.97) | 0.92(0.89-0.96) | 0.91(0.88-0.95) | 0.91(0.88-0.94) | 0.90(0.87-0.94) | 0.024                      |

<sup>a</sup> MET, metabolic equivalent of task.

<sup>b</sup> *P* value for non-linearity was calculated by testing the null hypothesis that the coefficient of the second spline is equal to 0.
