# Supplementary material for: The dose–response effect of physical activity on cancer mortality: findings from 71 prospective cohort studies
Source: HighWire-hosted journal article supplement (doi:10.1136/bjsports-2015-094927), 2015-09-18
Supplement: bjsports-2015-094927supp_table3.pdf [file bjsports-2015-094927supp_table3.pdf]

**Supplementary table S3** Dose-response relation between recreational physical activity and cancer mortality among cancer survivors

|                                     | Number of datasets included | Recreational physical activity (MET-h/wk) <sup>a</sup> |                 |                 |                 |                 | <i>P</i> <sup>b</sup> for non-linearity |        |
|-------------------------------------|-----------------------------|--------------------------------------------------------|-----------------|-----------------|-----------------|-----------------|-----------------------------------------|--------|
|                                     |                             | 0                                                      | 5               | 10              | 15              | 30              |                                         | 50     |
| Overall                             | 23                          | 1.00                                                   | 0.82(0.75-0.89) | 0.75(0.69-0.82) | 0.73(0.68-0.79) | 0.70(0.63-0.77) | 0.65(0.52-0.81)                         | <0.001 |
| Sex                                 |                             |                                                        |                 |                 |                 |                 |                                         |        |
| Female                              | 21                          | 1.00                                                   | 0.83(0.76-0.91) | 0.74(0.67-0.81) | 0.69(0.63-0.76) | 0.71(0.61-0.84) | /                                       | <0.001 |
| Location                            |                             |                                                        |                 |                 |                 |                 |                                         |        |
| North America                       | 21                          | 1.00                                                   | 0.84(0.78-0.92) | 0.75(0.69-0.82) | 0.71(0.65-0.76) | 0.69(0.62-0.76) | 0.75(0.61-0.92)                         | <0.001 |
| Cancer types                        |                             |                                                        |                 |                 |                 |                 |                                         |        |
| Breast cancer                       | 12                          | 1.00                                                   | 0.78(0.70-0.87) | 0.68(0.61-0.76) | 0.64(0.57-0.72) | 0.66(0.57-0.76) | 0.74(0.54-1.03)                         | <0.001 |
| Colorectal cancer                   | 8                           | 1.00                                                   | 0.89(0.76-1.02) | 0.84(0.70-0.96) | 0.80(0.65-0.94) | 0.63(0.48-0.83) | /                                       | 0.772  |
| When physical activity was measured |                             |                                                        |                 |                 |                 |                 |                                         |        |
| Pre-diagnosis                       | 14                          | 1.00                                                   | 0.82(0.74-0.91) | 0.78(0.71-0.87) | 0.79(0.71-0.87) | 0.79(0.68-0.92) | 0.79(0.57-1.12)                         | 0.002  |
| Post-diagnosis                      | 11                          | 1.00                                                   | 0.80(0.71-0.92) | 0.70(0.62-0.80) | 0.65(0.57-0.74) | 0.55(0.48-0.65) | 0.53(0.38-0.75)                         | 0.127  |
| Duration of follow-up (year)        |                             |                                                        |                 |                 |                 |                 |                                         |        |
| < 10                                | 21                          | 1.00                                                   | 0.82(0.74-0.89) | 0.76(0.69-0.82) | 0.75(0.68-0.82) | 0.72(0.63-0.80) | 0.67(0.53-0.86)                         | <0.001 |

<sup>a</sup> MET, metabolic equivalent of task.

<sup>b</sup> *P* value for non-linearity was calculated by testing the null hypothesis that the coefficient of the second spline is equal to 0.
